# Supplementary material for: Mutations in the Non-Catalytic Subunit Dpb2 of DNA Polymerase Epsilon Affect the Nrm1 Branch of the DNA Replication Checkpoint
Source: PubMed Central journal article supplement (PMC5291541; doi:10.1371/journal.pgen.1006572), 2017-01-20
Supplement: pgen.1006572.s006.pdf [file pgen.1006572.s006.pdf]

**S1 Table. Relative transcript levels normalized to wild-type G1-synchronized cells (time"0").**

| Gene         | min. | WT           |      |               |        |              |      | <i>dpb2-103</i> |        |             |      | <i>mec1-21</i> |      |  |  |
|--------------|------|--------------|------|---------------|--------|--------------|------|-----------------|--------|-------------|------|----------------|------|--|--|
|              |      | NT           |      | 200 mM HU     |        | NT           |      | 200 mM HU       |        | NT          |      | 200 mM HU      |      |  |  |
|              |      | AV           | SD   | AV            | SD     | AV           | SD   | AV              | SD     | AV          | SD   | AV             | SD   |  |  |
| <i>RNR3</i>  | 0    | <b>1,00</b>  |      | <b>1,00</b>   |        | <b>1,79</b>  | 0,65 | <b>1,79</b>     | 0,65   | <b>1,08</b> | 0,38 |                |      |  |  |
|              | 120  | <b>1,34</b>  | 0,71 | <b>15,91</b>  | 2,11   | <b>3,69</b>  | 0,63 | <b>29,72</b>    | 9,40   | <b>1,20</b> | 0,41 | <b>3,61</b>    | 0,58 |  |  |
|              | 240  | <b>3,09</b>  | 2,42 | <b>31,36</b>  | 13,63  | <b>6,59</b>  | 2,65 | <b>34,39</b>    | 9,35   | <b>0,78</b> | 0,27 | <b>5,02</b>    | 1,21 |  |  |
| <i>HUG1</i>  | 0    | <b>1,00</b>  |      | <b>1,0</b>    |        | <b>3,99</b>  | 1,51 | <b>3,99</b>     | 1,51   | <b>0,27</b> | 0,06 |                |      |  |  |
|              | 120  | <b>5,59</b>  | 2,80 | <b>315,6</b>  | 75,52  | <b>7,49</b>  | 2,46 | <b>256,9</b>    | 92,57  | <b>0,73</b> | 0,15 | <b>4,29</b>    | 0,50 |  |  |
|              | 240  | <b>5,47</b>  | 1,62 | <b>1194,8</b> | 506,20 | <b>14,18</b> | 3,07 | <b>1257,2</b>   | 338,35 | <b>0,60</b> | 0,13 | <b>16,65</b>   | 5,09 |  |  |
| <i>TOS2</i>  | 0    | <b>1,00</b>  |      | <b>1,00</b>   |        | <b>1,56</b>  | 0,49 | <b>1,56</b>     | 0,49   |             |      |                |      |  |  |
|              | 30   | <b>7,01</b>  | 2,70 | <b>5,25</b>   | 2,44   | <b>10,07</b> | 3,72 | <b>11,63</b>    | 5,25   |             |      |                |      |  |  |
|              | 60   | <b>9,28</b>  | 1,44 | <b>10,91</b>  | 2,32   | <b>3,54</b>  | 0,92 | <b>4,50</b>     | 1,49   |             |      |                |      |  |  |
|              | 90   | <b>5,50</b>  | 1,40 | <b>9,05</b>   | 2,19   | <b>2,02</b>  | 0,65 | <b>3,96</b>     | 1,38   |             |      |                |      |  |  |
|              | 120  | <b>5,15</b>  | 1,05 | <b>7,82</b>   | 1,73   | <b>3,37</b>  | 0,81 | <b>3,33</b>     | 0,84   |             |      |                |      |  |  |
|              | 180  | <b>7,78</b>  | 2,92 | <b>5,31</b>   | 2,49   | <b>4,31</b>  | 1,76 | <b>2,80</b>     | 0,44   |             |      |                |      |  |  |
|              | 240  | <b>5,65</b>  | 3,60 | <b>4,38</b>   | 3,68   | <b>11,24</b> | 7,55 | <b>3,88</b>     | 1,10   |             |      |                |      |  |  |
| <i>TOS4</i>  | 0    | <b>1,0</b>   |      | <b>1,0</b>    |        | <b>9,2</b>   | 3,5  | <b>9,2</b>      | 3,5    |             |      |                |      |  |  |
|              | 30   | <b>108,9</b> | 19,1 | <b>69,4</b>   | 19,8   | <b>257,3</b> | 70,0 | <b>299,2</b>    | 100,5  |             |      |                |      |  |  |
|              | 60   | <b>169,0</b> | 34,2 | <b>188,9</b>  | 44,5   | <b>48,7</b>  | 9,6  | <b>47,1</b>     | 23,8   |             |      |                |      |  |  |
|              | 90   | <b>53,9</b>  | 17,1 | <b>125,3</b>  | 38,4   | <b>29,0</b>  | 6,7  | <b>58,4</b>     | 16,0   |             |      |                |      |  |  |
|              | 120  | <b>26,2</b>  | 9,6  | <b>86,8</b>   | 19,7   | <b>41,9</b>  | 13,9 | <b>46,3</b>     | 18,1   |             |      |                |      |  |  |
|              | 180  | <b>111,1</b> | 32,0 | <b>83,3</b>   | 27,4   | <b>112,2</b> | 30,6 | <b>78,0</b>     | 23,8   |             |      |                |      |  |  |
|              | 240  | <b>58,1</b>  | 25,1 | <b>53,3</b>   | 17,5   | <b>129,1</b> | 30,7 | <b>81,7</b>     | 29,5   |             |      |                |      |  |  |
| <i>MCD1</i>  | 0    | <b>1,0</b>   |      | <b>1,0</b>    |        | <b>7,1</b>   | 4,0  | <b>7,1</b>      | 4,0    |             |      |                |      |  |  |
|              | 30   | <b>75,8</b>  | 11,8 | <b>62,8</b>   | 15,1   | <b>109,1</b> | 24,9 | <b>164,6</b>    | 33,7   |             |      |                |      |  |  |
|              | 60   | <b>114,6</b> | 38,4 | <b>122,5</b>  | 30,5   | <b>23,2</b>  | 4,5  | <b>23,4</b>     | 8,7    |             |      |                |      |  |  |
|              | 90   | <b>52,7</b>  | 27,3 | <b>60,8</b>   | 13,4   | <b>15,9</b>  | 3,7  | <b>30,7</b>     | 7,0    |             |      |                |      |  |  |
|              | 120  | <b>28,0</b>  | 6,8  | <b>77,8</b>   | 20,7   | <b>24,1</b>  | 13,5 | <b>24,1</b>     | 9,4    |             |      |                |      |  |  |
|              | 180  | <b>100,5</b> | 41,3 | <b>79,7</b>   | 30,6   | <b>62,8</b>  | 19,1 | <b>38,0</b>     | 8,2    |             |      |                |      |  |  |
|              | 240  | <b>38,7</b>  | 15,3 | <b>36,8</b>   | 11,4   | <b>76,9</b>  | 18,5 | <b>40,6</b>     | 8,7    |             |      |                |      |  |  |
| <i>CDC21</i> | 0    | <b>1,00</b>  |      | <b>1,0</b>    |        | <b>2,13</b>  | 0,53 | <b>2,13</b>     | 0,53   |             |      |                |      |  |  |
|              | 30   | <b>8,82</b>  | 3,54 | <b>6,55</b>   | 2,65   | <b>12,96</b> | 2,68 | <b>14,10</b>    | 2,20   |             |      |                |      |  |  |
|              | 60   | <b>11,66</b> | 4,39 | <b>13,23</b>  | 3,40   | <b>7,20</b>  | 0,88 | <b>7,02</b>     | 2,05   |             |      |                |      |  |  |
|              | 90   | <b>6,40</b>  | 1,77 | <b>11,24</b>  | 2,68   | <b>2,77</b>  | 1,18 | <b>6,45</b>     | 0,74   |             |      |                |      |  |  |
|              | 120  | <b>4,46</b>  | 2,23 | <b>9,57</b>   | 2,55   | <b>4,49</b>  | 1,16 | <b>6,63</b>     | 1,38   |             |      |                |      |  |  |
|              | 180  | <b>8,76</b>  | 3,07 | <b>9,88</b>   | 2,50   | <b>6,59</b>  | 2,68 | <b>7,15</b>     | 2,28   |             |      |                |      |  |  |
|              | 240  | <b>5,37</b>  | 2,60 | <b>9,74</b>   | 4,13   | <b>11,37</b> | 2,42 | <b>7,69</b>     | 4,04   |             |      |                |      |  |  |
